# Supplementary material for: Platelet‐derived growth factor (PDGF)‐BB protects dopaminergic neurons via activation of Akt/ERK/CREB pathways to upregulate tyrosine hydroxylase
Source: PubMed Central journal article supplement (PMC8504523; doi:10.1111/cns.13708), 2021-08-04

sFigure 4

Figure 1H

TH: 58kD

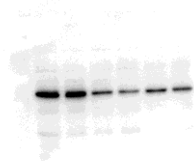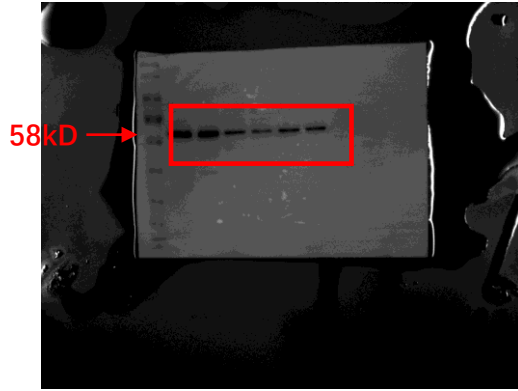

$\beta$ -actin: 42kD

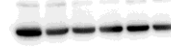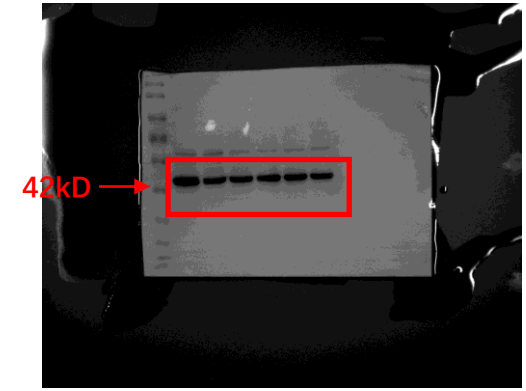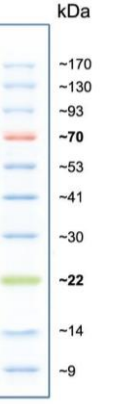

Figure 1J

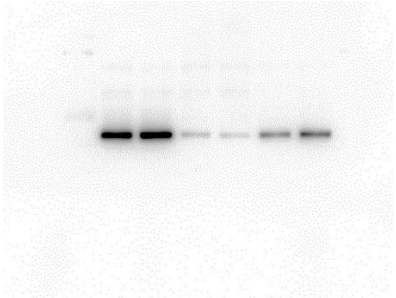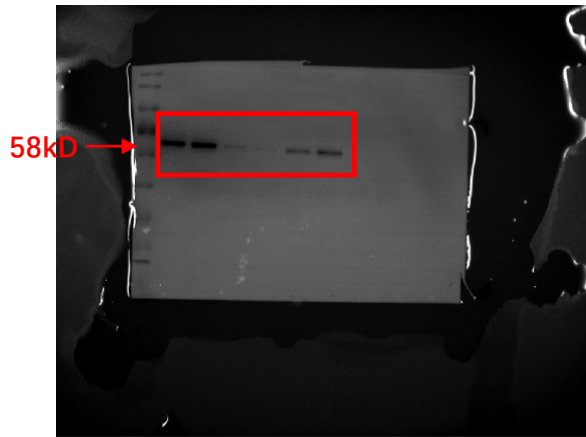

待处理

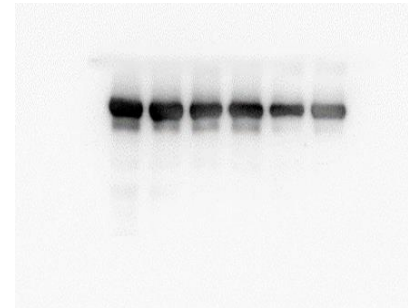

Figure 2B

TH: 58kD

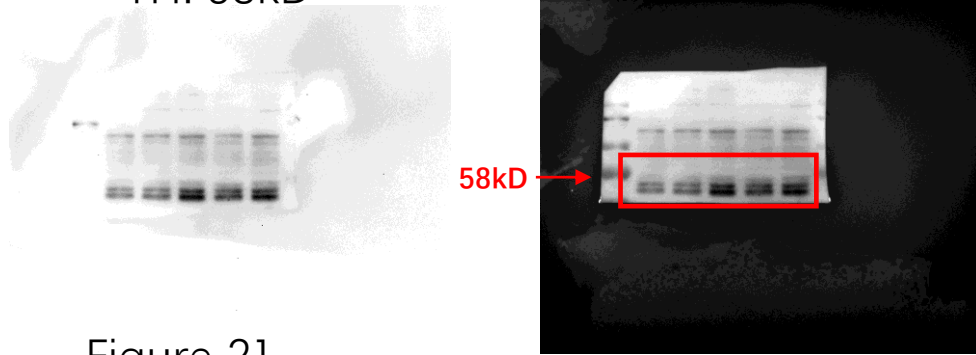

$\beta$ -actin: 42kD

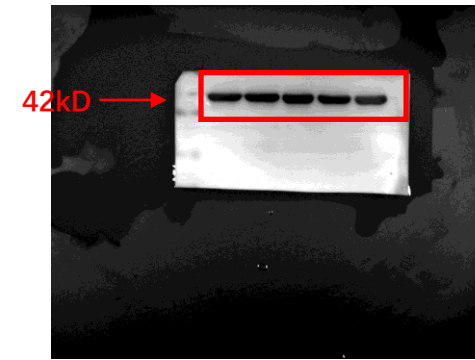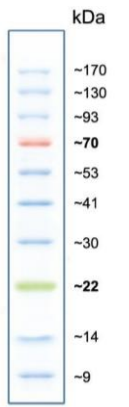

Figure 2J

TH: 58kD

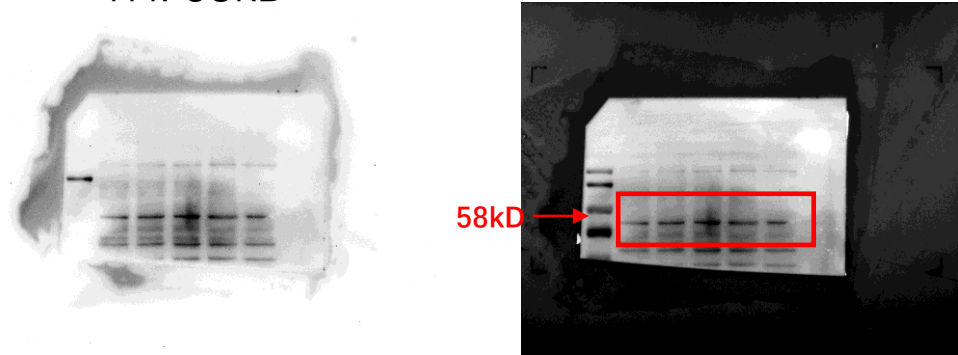

$\beta$ -actin: 42kD

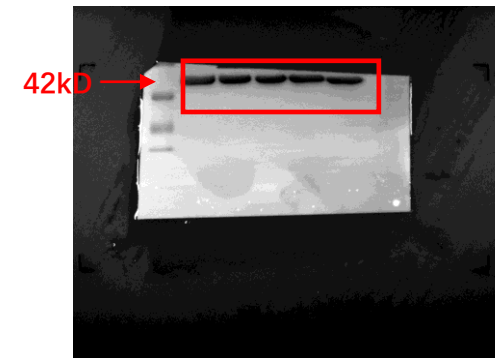

Figure 2F

TH: 58kD

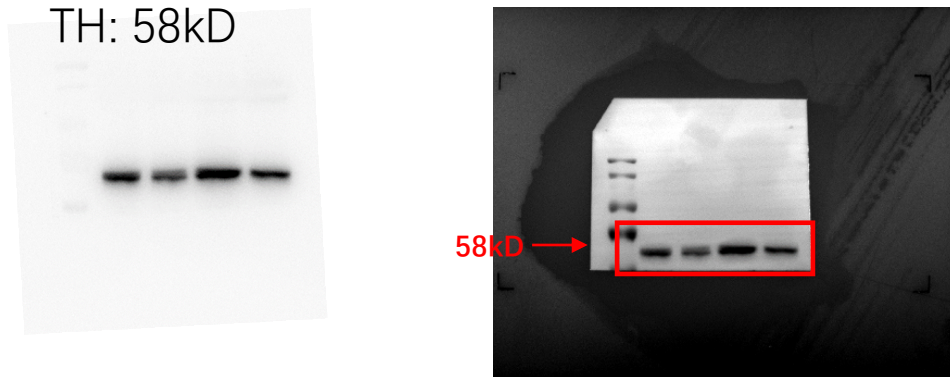

$\beta$ -actin: 42kD

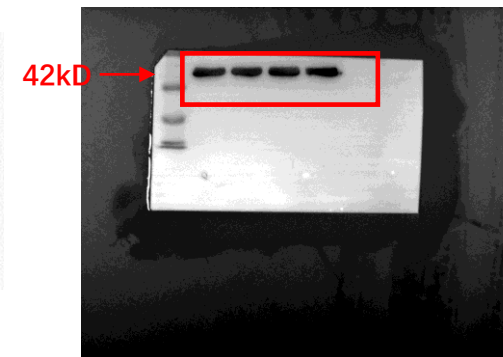

Figure 3A

P-Akt: 60kD

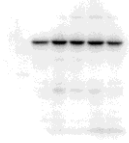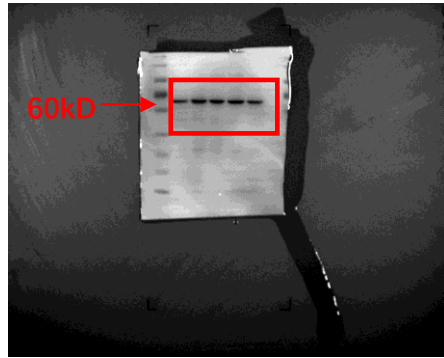

T-Akt: 60kD

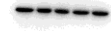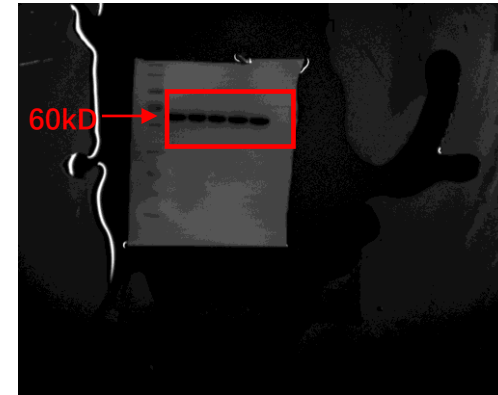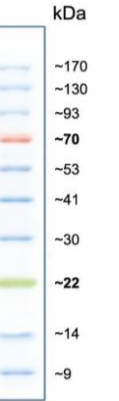

Figure 3B

P-ERK: 42、44kD

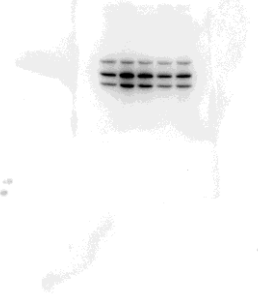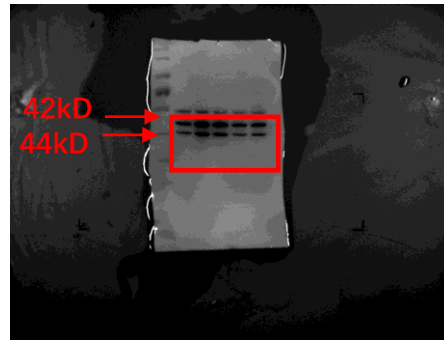

T-ERK: 42、44kD

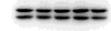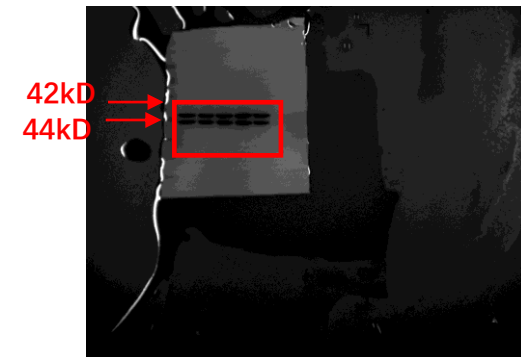

Figure 3C

P-ERK: 42、44kD

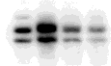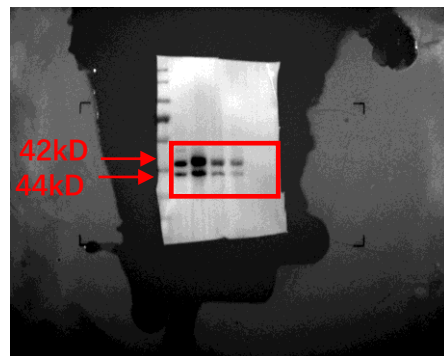

T-ERK: 42、44kD

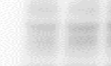

Figure 3D

P-Akt: 60kD

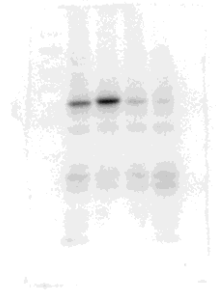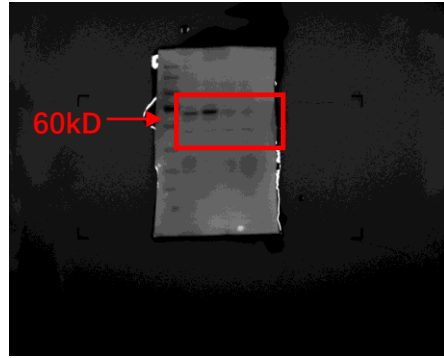

T-Akt: 60kD

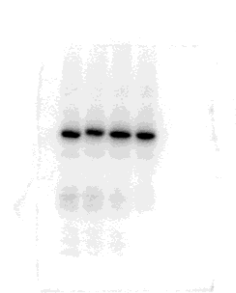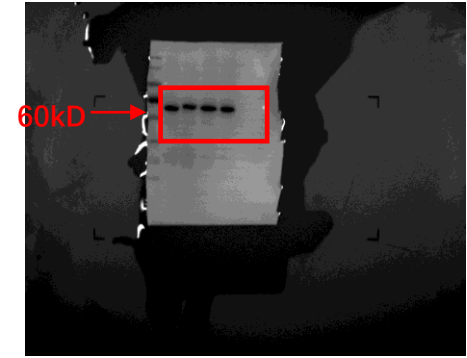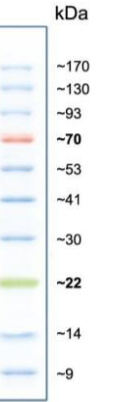

Figure 3E

TH: 58kD

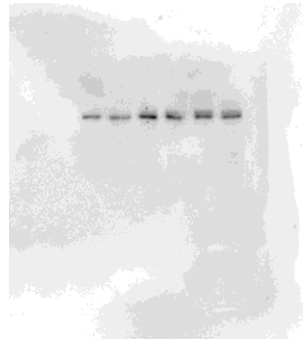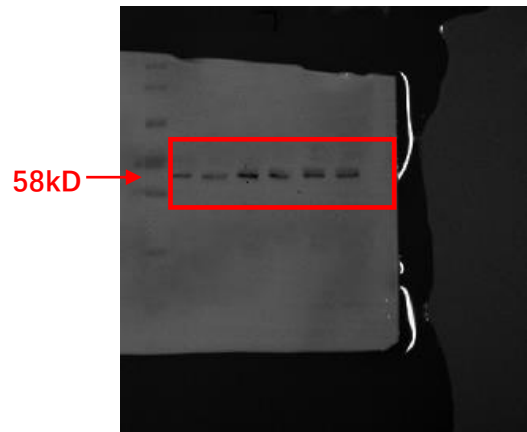

$\beta$ -actin: 42kD

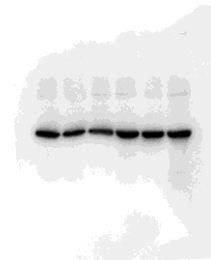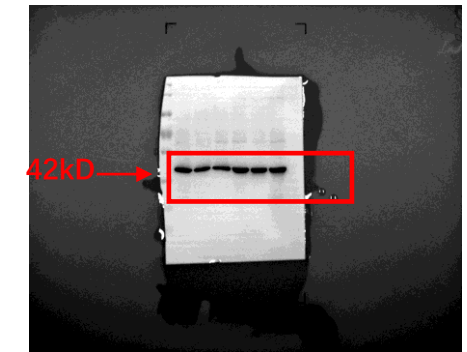

Figure 4A

P-CREB:43kD

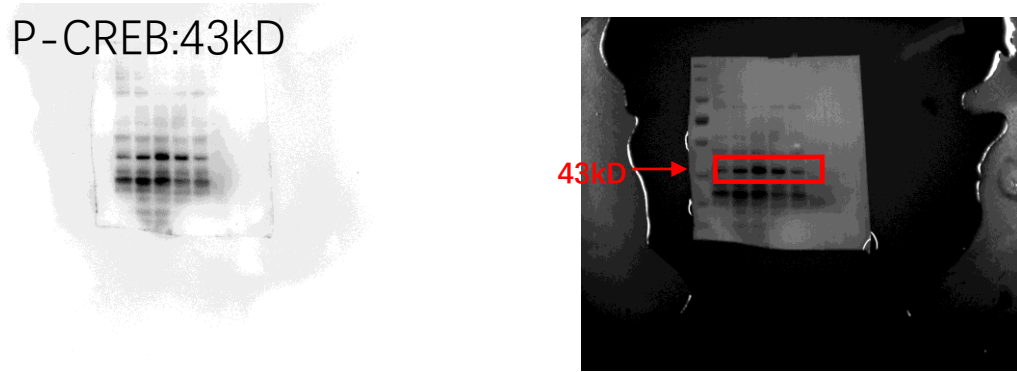

T-CREB:43kD

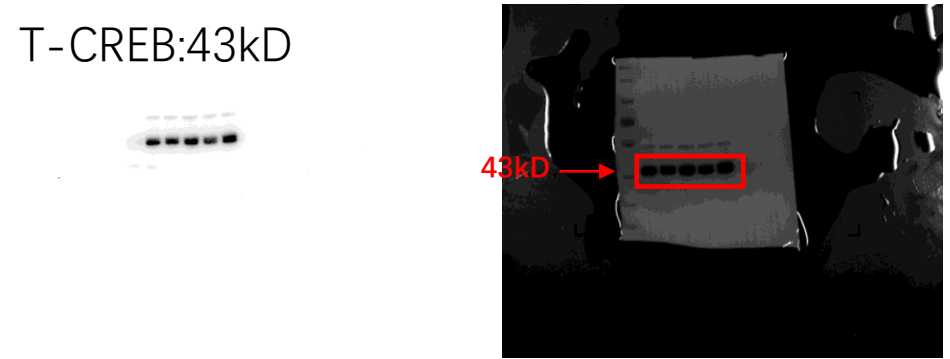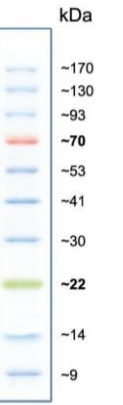

Figure 4B

P-CREB

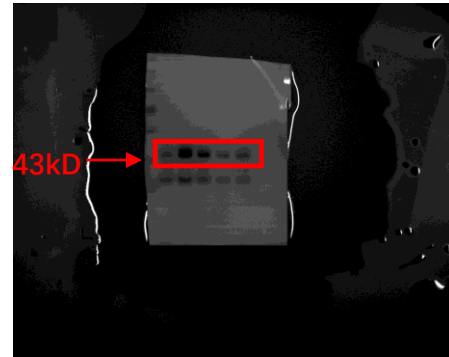

T-CREB

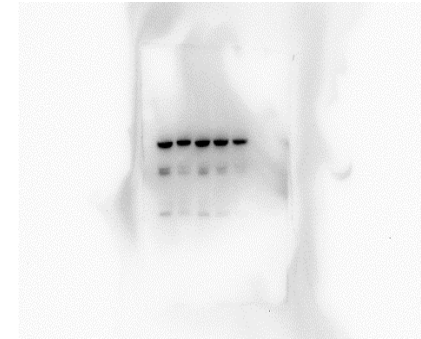

Figure 4E

P-CREB

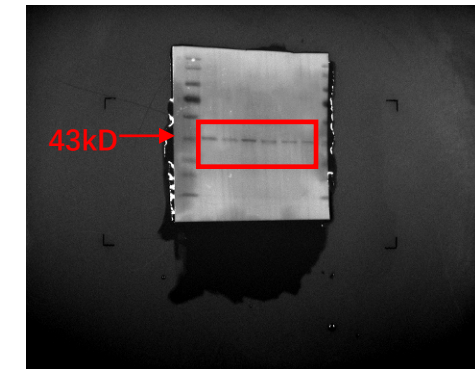

Lamin-B

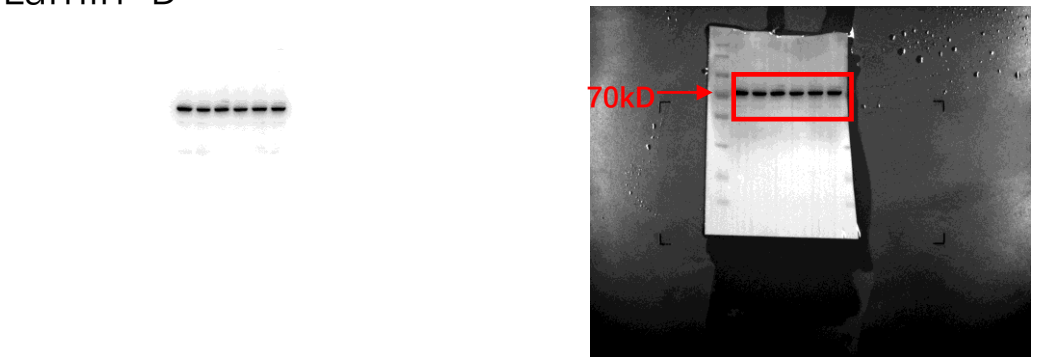

Figure 5E

T-CREB:43kD

$\beta$ -actin : 42kD

Figure 5C

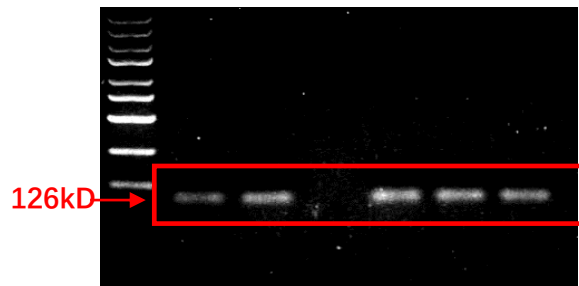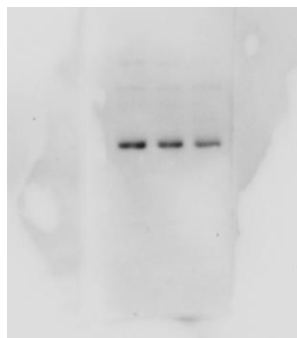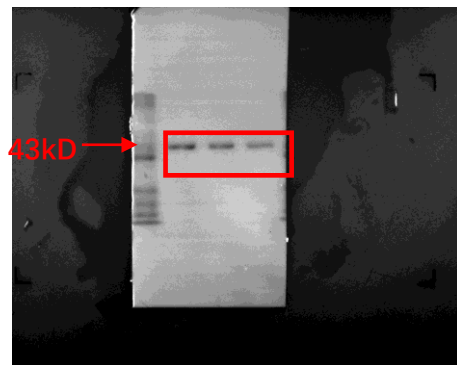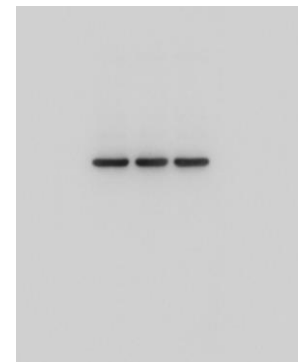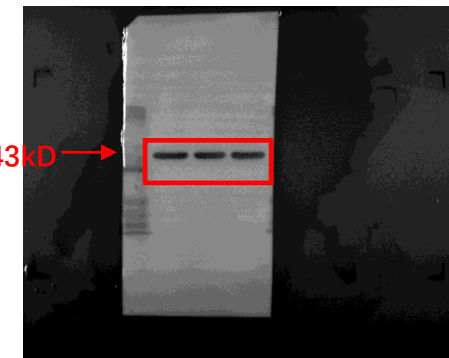

Figure 5F

TH:58kD

$\beta$ -actin:42kD

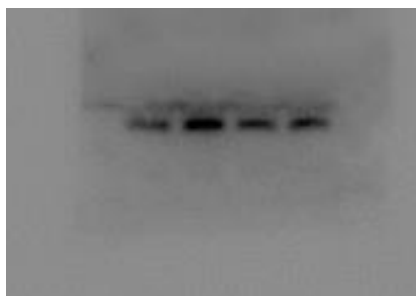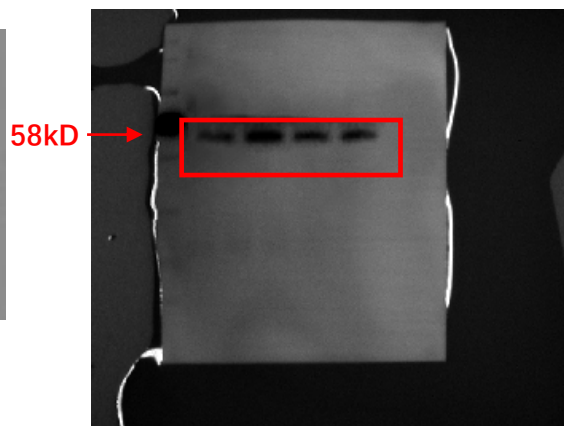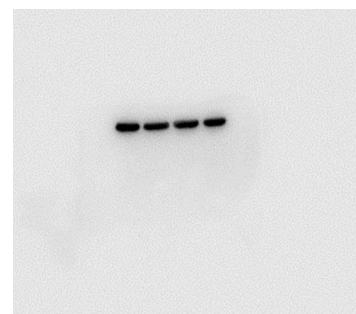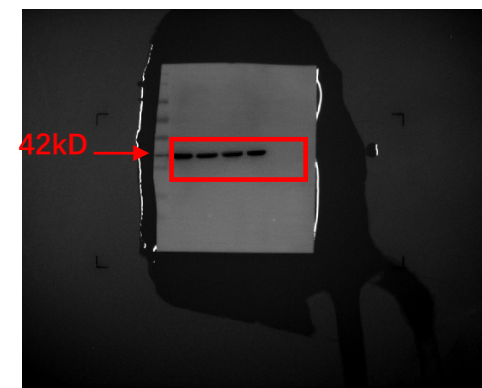

Figure 5G

TH:58kD

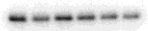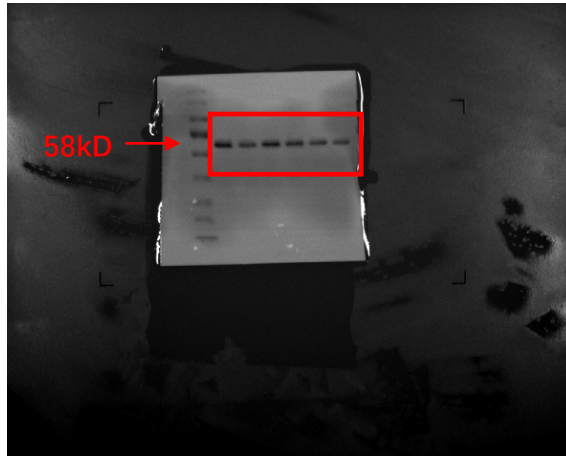

$\beta$ -actin:42kD

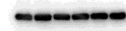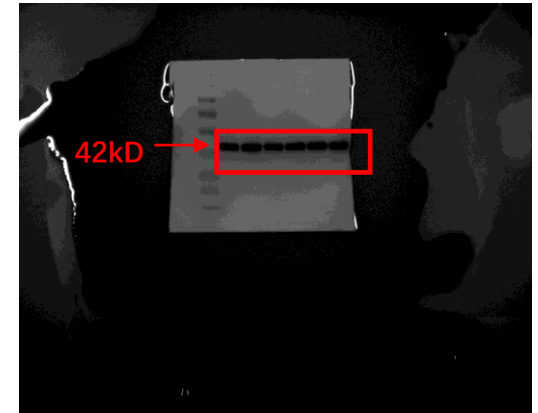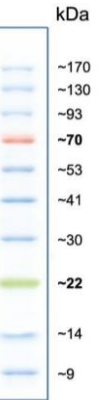

Supplement: CNS-27-1300-s002.pdf [file CNS-27-1300-s002.pdf]
