# Supplementary material for: Platelet‐derived growth factor (PDGF)‐BB protects dopaminergic neurons via activation of Akt/ERK/CREB pathways to upregulate tyrosine hydroxylase
Source: PubMed Central journal article supplement (PMC8504523; doi:10.1111/cns.13708), 2021-08-04
Supplement: CNS-27-1300-s003.pdf [file CNS-27-1300-s003.pdf]

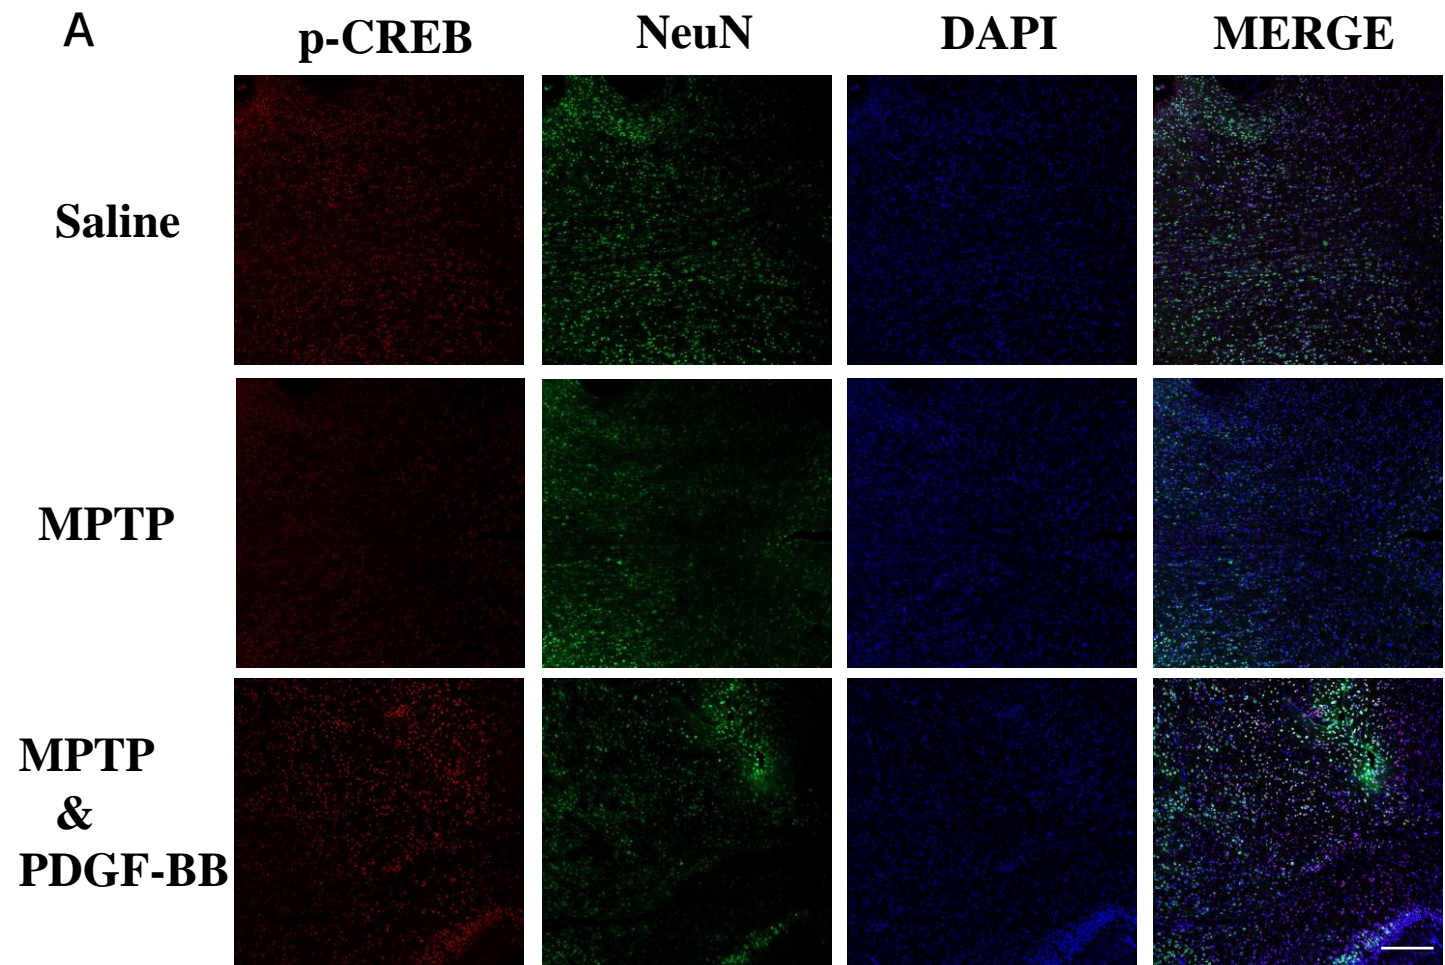

**sFig2.p-CREB in the midbrain:** Representative image of immunofluorescence staining demonstrating increased p-CREB in the midbrain region in PDGF-BB administrated mice brain. The Tiles function on the Zeiss confocal microscopy was used to collect lower magnification image in this region. Scale bar:100 $\mu$ m.
