# Supplementary material for: Platelet‐derived growth factor (PDGF)‐BB protects dopaminergic neurons via activation of Akt/ERK/CREB pathways to upregulate tyrosine hydroxylase
Source: PubMed Central journal article supplement (PMC8504523; doi:10.1111/cns.13708), 2021-08-04
Supplement: CNS-27-1300-s004.pdf [file CNS-27-1300-s004.pdf]

sFig.1

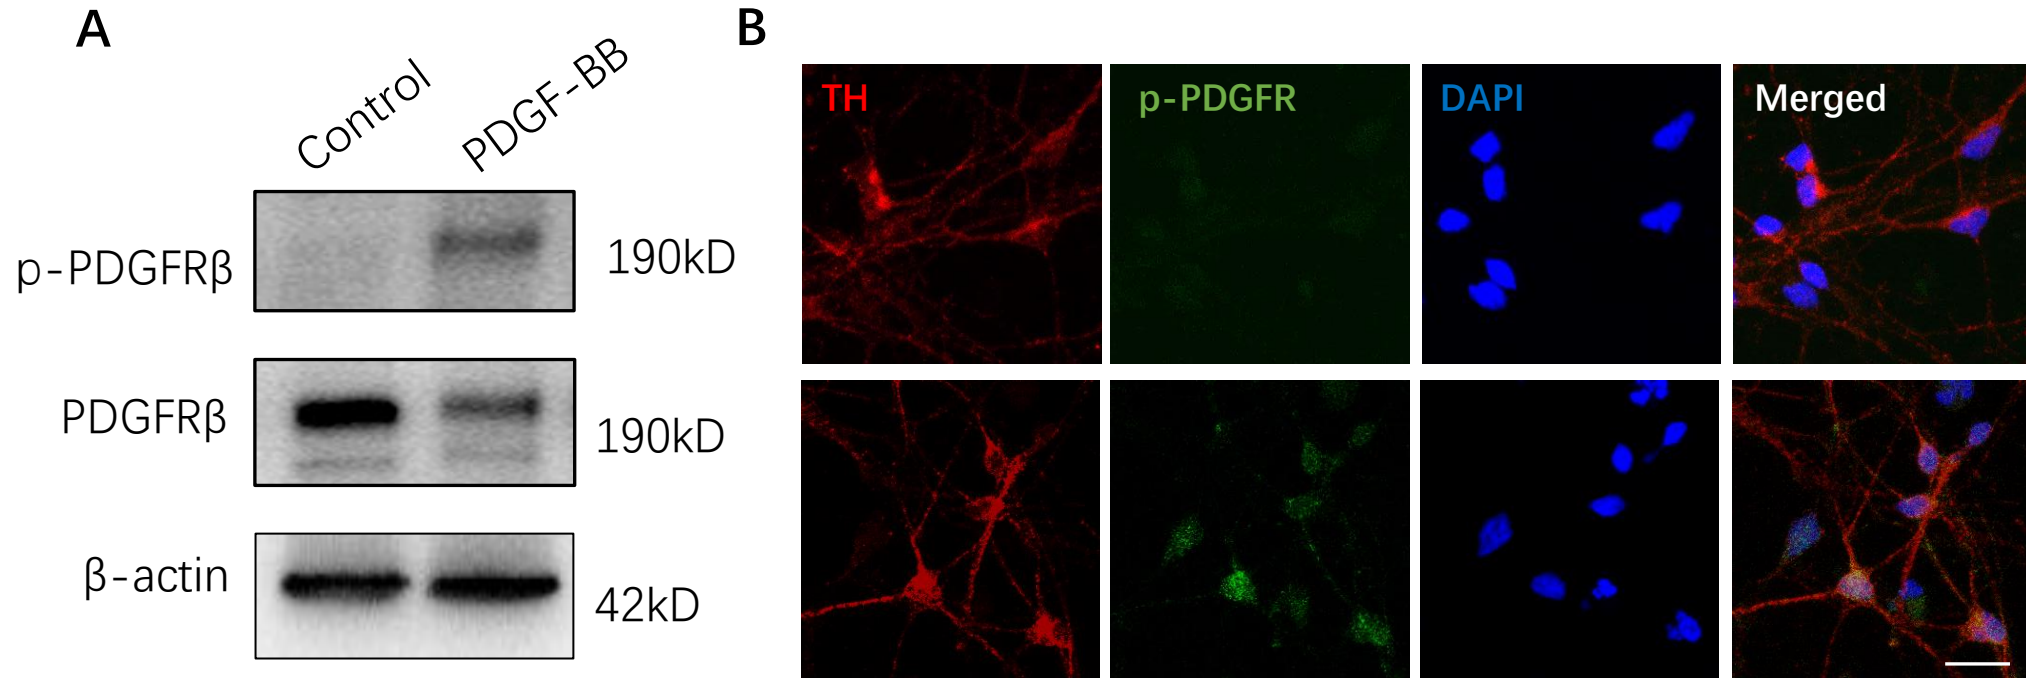

**(A)** Activation of PDGFR $\beta$  was evidenced by increased p-PGFR $\beta$  in response to PDGF-BB stimulation followed by WB analysis. **(B)** Primary dopaminergic neurons. Representative immunocytochemical images of control group (upper panels) and PDGF-BB stimulated group (lower panels). The cells were stained for TH (red), p-PDGFR(green) and DAPI (blue), Scale bars, 50  $\mu$ m.
